# Supplementary material
Source: Springer Nature journal article supplement (https://www.springermedizin.de/resource/supplementary/12885_2011_2727_MOESM2_ESM.pdf/9461908)
Supplement: MOESM2 [file 9461908]

**A.**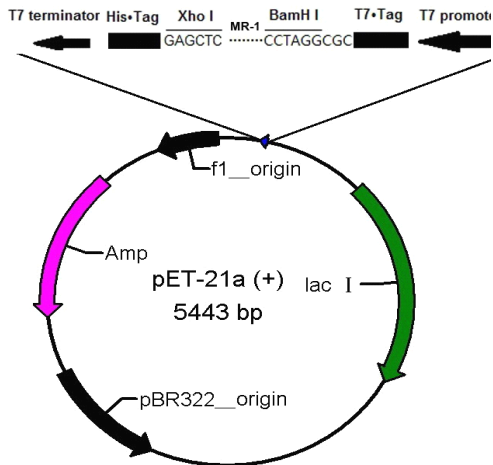**B.**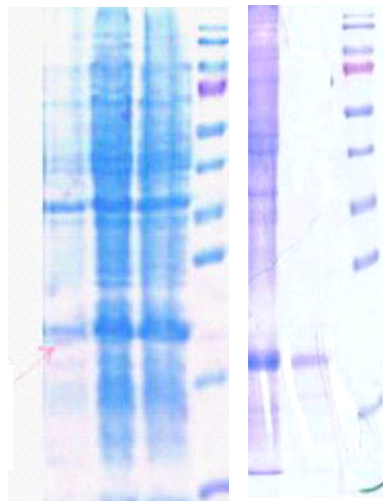**Target protein**

1 2 3 M 1' 2' M

**C.****The titer of anti-MR-1 PcAb tested by ELISA\***

| MR-1 PcAb | Blank | 1:5000 | 1:10000 | 1:20000 | 1:40000 | 1:80000 |  |
|-----------|-------|--------|---------|---------|---------|---------|--|
| R1        | 0.06  | 1.53   | 0.79    | 0.43    | 0.25    | 0.14    |  |
| R2        | 0.07  | 2.36   | 2.21    | 2.04    | 1.42    | 0.75    |  |

\*, MR-1 recombinant protein was coated at 1 $\mu$ g.**D.**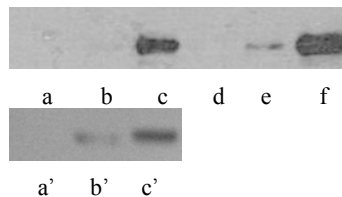

a' b' c'
